# Supplementary material
Source: HighWire-hosted journal article supplement (https://jnis.bmj.com/content/10/12/1174)

***Formula of scalar product***


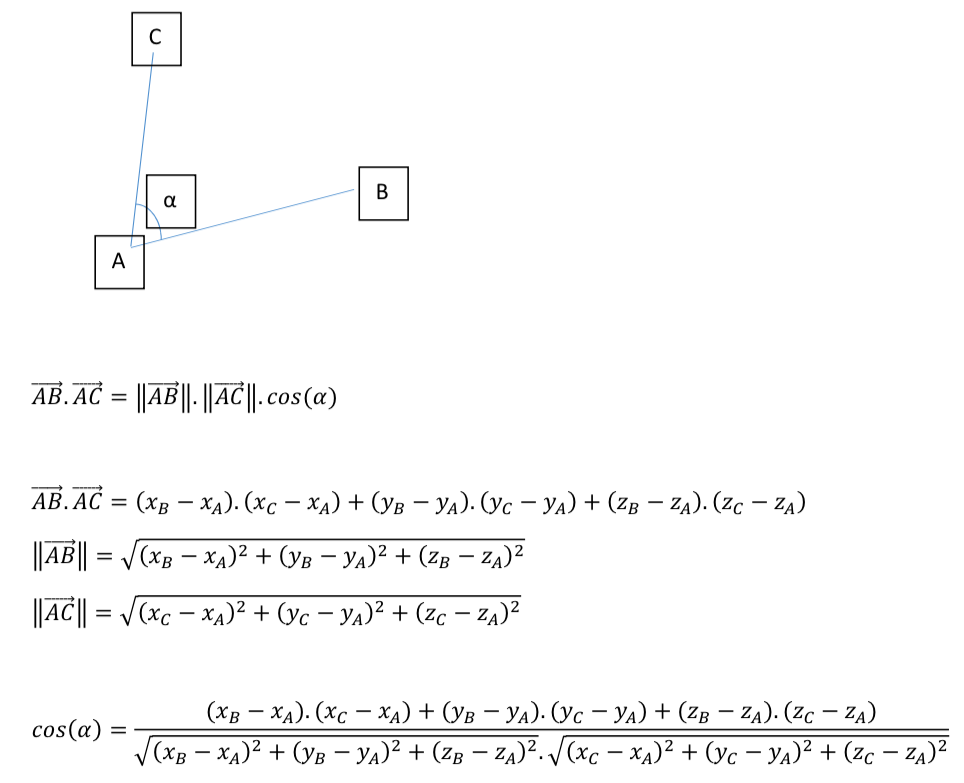

Supplement: inline-supplementary-material-1 [file inline-supplementary-material-1.docx]
